# Supplementary material
Source: ML conference proceedings conference paper supplement (https://proceedings.neurips.cc/paper_files/paper/2020/hash/21327ba33b3689e713cdff1641128004-Abstract.html)
Supplement: Supplementary file [file 21327ba33b3689e713cdff1641128004-Supplemental.pdf]

---

# Supplementary for: UCLID-Net: Single View Reconstruction in Object Space

---

Anonymous Author(s)

Affiliation

Address

email

## 1 Metrics

2 This section defines the metrics and loss functions used in the main paper.

### 3 1.1 Chamfer-L1

4 The Chamfer-L1 (CD- $L_1$ ) pseudo distance  $d_{CD_1}$  between point clouds  $X = \{x_i | 1 \leq i \leq N, x_i \in \mathbb{R}^3\}$  and  $Y = \{y_j | 1 \leq j \leq M, y_j \in \mathbb{R}^3\}$  is the following:

$$d_{CD_1}(X, Y) = \frac{1}{|X|} \cdot \sum_{x \in X} \min_{y \in Y} \|x - y\|_2 + \frac{1}{|Y|} \cdot \sum_{y \in Y} \min_{x \in X} \|x - y\|_2, \quad (1)$$

6 where  $\|\cdot\|_2$  is the Euclidean distance. We use CD- $L_1$  as a validation metric on the Pix3D dataset, according to the original procedure. It is applied on shapes normalized to bounding box  $[-0.5, 0.5]^3$ , and sampled with 1024 points.

### 9 1.2 Chamfer-L2

10 The Chamfer-L2 (CD- $L_2$ ) pseudo distance  $d_{CD_2}$  between point clouds  $X$  and  $Y$  is the following:

$$d_{CD_2}(X, Y) = \frac{1}{|X|} \cdot \sum_{x \in X} \min_{y \in Y} \|x - y\|_2^2 + \frac{1}{|Y|} \cdot \sum_{y \in Y} \min_{x \in X} \|x - y\|_2^2 \quad (2)$$

11 i.e. CD- $L_2$  is the average of the *squares* of closest neighbors matching distances. We use CD- $L_2$  as a validation metric on the ShapeNet dataset. It is applied on shapes normalized to unit radius sphere, and sampled with 2048 points.

### 14 1.3 Earth Mover's distance

15 The Earth Mover's Distance (EMD) is a distance that can be used to compare point clouds as well:

$$d_{EMD}(X, Y) = \min_{T \in \varphi(N, M)} \sum_{1 \leq i \leq N, 1 \leq j \leq M} T_{i,j} \times \|x_i - y_j\|_2 \quad (3)$$

16 where  $\varphi(N, M)$  is the set of all possible uniform *transport plans* from a point cloud of  $N$  points to one of  $M$  points, i.e.  $\varphi(N, M)$  is the set of all  $N \times M$  matrices with real coefficients larger than or equal to 0, such that the sum of each line equals  $1/N$  and the sum of each column equals  $1/M$ .

19 The high computational cost of EMD implies that it is mostly used for validation only, and in an approximated form. On ShapeNet, we use the implementation from [5] on point clouds normalized

21 to unit radius sphere, and sampled with 2048 points. On Pix3D, we use the implementation from [6]  
 22 on point clouds normalized to bounding box  $[-0.5, 0.5]^3$ , and sampled with 1024 points.

## 23 1.4 F-score

24 The F-Score is introduced in [7], as an evaluation of distance between two object surfaces sampled  
 25 as point clouds. Given a ground truth and a reconstructed surface, the F-Score at a given threshold  
 26 distance  $d$  is the harmonic mean of precision and recall, with:

- 27 • **precision** being the percentage of reconstructed points lying within distance  $d$  to a point of  
 28 the ground truth;
- 29 • **recall** being the percentage of ground truth points lying within distance  $d$  to a point of the  
 30 reconstructed surface.

31 We use the F-Score as a validation metric on the ShapeNet dataset. It is applied on shapes normalized  
 32 to unit radius sphere, and sampled with 10000 points. The distance threshold is fixed at 5% side-length  
 33 of bounding box  $[-1, 1]^3$ , i.e.  $d = 0.1$ .

## 34 1.5 Shell Intersection over Union

35 We introduce shell-Intersection over Union (sIoU). It is the intersection over union computed on  
 36 voxelized surfaces, obtained as the binary occupancy grids of reconstructed and ground truth shapes.  
 37 As opposed to volumetric-IoU which is dominated by the interior parts of the objects, sIoU accounts  
 38 only for the overlap between object surfaces instead of volumes.

39 We use the sIoU as a validation metric on the ShapeNet dataset. The occupancy grid divides the  
 40  $[-1, 1]^3$  bounding box at resolution  $50 \times 50 \times 50$ , and is populated by shapes normalized to unit  
 41 radius sphere.

## 42 2 Network details

43 We here present some details of the architecture and training procedure for UCLID-Net. We will  
 44 make our entire code base publicly available.

45 **3D CNN** UCLID-Net uses  $S = 4$  scales, and feature map  $F_s$  is the output of the  $s$ -th residual layer  
 46 of the ResNet18 [4] encoder, passed through a 2D convolution with kernel size 1 to reduce its feature  
 47 channel dimension before being back-projected. In the 3D CNN,  $layer_4$ ,  $layer_3$ , and  $layer_2$  are  
 48 composed of 3D convolutional blocks, mirroring the composition of a residual layer in the ResNet18  
 49 image encoder, with:

- 50 • 2D convolutions replaced by 3D convolutions;
- 51 • 2D downsampling layers replaced by 3D transposed convolutions.

52 Final  $layer_1$  is a single 3D convolution. Each *concat* operation repeats depth grids twice along their  
 53 single binary feature dimension before concatenating them to feature grids. Tab. 1 summarizes the  
 54 size of feature maps and grids appearing on Fig. 1 of the main paper.

55 **Local shape regressors** The last feature grid  $H_0$  produced by the 3D CNN is passed to two  
 56 downstream Multi Layer Perceptrons (MLPs). First, a coarse voxel shape is predicted by MLP *occ*.  
 57 Then, within each predicted occupied voxel, a local patch is folded in the manner of AtlasNet [3], by  
 58 MLP *fold*. Both MLPs locally process each voxel of  $H_0$  independently.

59 First, MLP *occ* outputs a surface occupancy grid  $\tilde{O}$  such that

$$\tilde{O}_{xyz} = occ((H_0)_{xyz}) \quad (4)$$

60 at every voxel location  $(x, y, z)$ .  $\tilde{O}$  is compared against ground truth occupancy grid  $O$  using binary  
 61 cross-entropy:

$$\mathcal{L}_{BCE}(\tilde{O}, O) = - \sum_{xyz} \left[ O_{xyz} \cdot \log(\tilde{O}_{xyz}) + (1 - O_{xyz}) \cdot \log(1 - \tilde{O}_{xyz}) \right] \quad (5)$$

Table 1: **UCLID-Net architecture:** tensor sizes, names according to Fig. 1 of the main paper.

| Nature           | Name      | Spatial resolution       | Number of features |
|------------------|-----------|--------------------------|--------------------|
| input image      | $I$       | $224 \times 224$         | 3                  |
| 2D feature maps  | $F_1$     | $56 \times 56$           | 30                 |
|                  | $F_2$     | $28 \times 28$           | 30                 |
|                  | $F_3$     | $14 \times 14$           | 30                 |
|                  | $F_4$     | $7 \times 7$             | 290                |
| 2D feature grids | $G^{F_1}$ | $28 \times 28 \times 28$ | 30                 |
|                  | $G^{F_2}$ | $28 \times 28 \times 28$ | 30                 |
|                  | $G^{F_3}$ | $14 \times 14 \times 14$ | 30                 |
|                  | $G^{F_4}$ | $7 \times 7 \times 7$    | 290                |
| 3D depth grids   | $G_1^D$   | $28 \times 28 \times 28$ | 1 (binary)         |
|                  | $G_2^D$   | $28 \times 28 \times 28$ |                    |
|                  | $G_3^D$   | $14 \times 14 \times 14$ |                    |
|                  | $G_4^D$   | $7 \times 7 \times 7$    |                    |
| 3D CNN outputs   | $H_0$     | $28 \times 28 \times 28$ | 40                 |
|                  | $H_1$     | $28 \times 28 \times 28$ | 73                 |
|                  | $H_2$     | $28 \times 28 \times 28$ | 73                 |
|                  | $H_3$     | $14 \times 14 \times 14$ | 146                |

62  $\mathcal{L}_{BCE}$  provides supervision for training the 2D image encoder convolutions, the 3D decoder convolu-  
 63 tions and MLP *occ*.

64 Then *fold*, the second MLP learns a 2D parametrization of 3D surfaces within voxels whose predicted  
 65 occupancy is larger than a threshold  $\tau$ . As in [3, 10], such learned parametrization is physically  
 66 explained by folding a flat sheet of paper (or a patch) in space. It continuously maps a discrete set  
 67 of 2D parameters  $(u, v) \in \Lambda$  to 3D points in space. A patch can be sampled at arbitrary resolution.  
 68 In our case, we use a single MLP whose input is locally conditioned on the value of  $(H_0)_{xyz}$ . The  
 69 predicted point cloud  $\tilde{X}$  is defined as the union of all point samples over all folded patches:

$$\tilde{X} = \bigcup_{\substack{xyz \\ \tilde{O}_{xyz} > \tau}} \left\{ \begin{pmatrix} x \\ y \\ z \end{pmatrix} + fold(u, v | (H_0)_{xyz}) \mid (u, v) \in \Lambda \right\} \quad (6)$$

70 Notice that 3D points are expressed relatively to the coordinate of their voxel. As a result, we can  
 71 explicitly restrict the spatial extent of a patch to the voxel it belongs to. We use the Chamfer-L2  
 72 pseudo-distance to compare  $\tilde{X}$  to a ground truth point cloud sampling of the shape  $X$ :  $\mathcal{L}_{CD}(\tilde{X}, X) =$   
 73  $d_{CD_2}(\tilde{X}, X)$ .

74  $\mathcal{L}_{CD}$  provides supervision for training the 2D image encoder convolutions, the 3D decoder convo-  
 75 lutions and MLP *fold*. The total loss function is a weighted combination of the two losses  $\mathcal{L}_{BCE}$   
 76 and  $\mathcal{L}_{CD}$ . Practically, for training each patch of  $\tilde{X}$  is sampled with  $|\Lambda| = 10$  uniformly sampled  
 77 parameters, and  $X$  is composed of 5000 points.

78 **Pre-training** UCLID-Net is first trained for one epoch using the occupancy loss  $\mathcal{L}_{BCE}$  only.

79 **Normalization layers** In the ResNet18 that serves as our image encoder, we replace the batch-  
 80 normalization layers by instance normalization ones. We empirically found out this provides greater  
 81 stability during training, and improves final performance.

82 **Regressing depth maps** We slightly adapt the off-the-shelf network architecture used for regressing  
 83 depth maps [1]. We modify the backbone CNN to be a ResNet18 with instance normalization layers.  
 84 Additionally, we perform less down-sampling by removing the initial pooling layer. As a result the  
 85 input size is  $224 \times 224$  and the output size is  $112 \times 112$ .

86 **Regressing cameras** We similarly adapt the off-the-shelf network architecture used for regressing  
 87 cameras in [9]: the backbone VGG is replaced by a ResNet18 with instance normalization layers.

### 88 3 Per-category results on ShapeNet

89 We here report per-category validation metrics for UCLID-Net and baseline methods: AtlasNet [3]  
 90 (AN), Pixel2Mesh<sup>+</sup> and Mesh R-CNN [8, 2] (P2M<sup>+</sup> and MRC), DISN [9] and UCLID-Net (ours).

91 Tab. 2 reports Chamfer-L2 validation metric, Tab. 3 the Earth Mover’s Distance, Tab. 4 the Shell  
 92 Intersection over Union and Tab. 5 the F-Score at 5% distance threshold (ie.  $d = 0.1$ ).

Table 2: **Chamfer-L2 Distance** (CD,  $\times 10^3$ ) for single view reconstructions on ShapeNet Core, with various methods, computed on shapes scaled to fit unit radius sphere, sampled with 2048 points. The lower the better.

| method           | category   |            |            |            |            |            |             |             |            |            |            |            |            | mean       |
|------------------|------------|------------|------------|------------|------------|------------|-------------|-------------|------------|------------|------------|------------|------------|------------|
|                  | plane      | bench      | box        | car        | chair      | display    | lamp        | speaker     | rifle      | sofa       | table      | phone      | boat       |            |
| AN               | 10.6       | 15.0       | 30.7       | 10.0       | 11.6       | 17.3       | 17.0        | 22.0        | 6.4        | 11.9       | 12.3       | 12.2       | 10.7       | 13.0       |
| P2M <sup>+</sup> | 11.0       | 4.6        | <b>6.8</b> | 5.3        | 6.1        | 8.0        | 11.4        | <b>10.3</b> | <b>4.3</b> | 6.5        | <b>6.3</b> | <b>5.0</b> | 7.2        | 7.0        |
| MRC              | 12.1       | 7.5        | 9.7        | 6.5        | 8.9        | 9.3        | 14.0        | 13.5        | 5.7        | 7.7        | 8.1        | 6.9        | 8.6        | 9.0        |
| DISN             | 6.3        | 6.6        | 11.3       | 5.3        | 9.6        | 8.6        | 23.6        | 14.5        | 4.4        | 6.0        | 12.5       | 5.2        | 7.8        | 9.7        |
| Ours             | <b>5.3</b> | <b>4.2</b> | 7.4        | <b>4.1</b> | <b>4.7</b> | <b>6.9</b> | <b>10.9</b> | 13.8        | 5.8        | <b>5.7</b> | 6.9        | 6.0        | <b>5.0</b> | <b>6.3</b> |

Table 3: **Earth Mover’s Distance** (EMD,  $\times 10^2$ ) for single view reconstructions on ShapeNet Core, with various methods, computed on shapes scaled to fit unit radius sphere, sampled with 2048 points. The lower the better.

| method           | category   |            |            |            |            |            |            |            |            |            |            |            |            | mean       |
|------------------|------------|------------|------------|------------|------------|------------|------------|------------|------------|------------|------------|------------|------------|------------|
|                  | plane      | bench      | box        | car        | chair      | display    | lamp       | speaker    | rifle      | sofa       | table      | phone      | boat       |            |
| AN               | 6.3        | 7.9        | 9.5        | 8.3        | 7.8        | 8.8        | 9.8        | 10.2       | 6.6        | 8.2        | 7.8        | 9.9        | 7.1        | 8.0        |
| P2M <sup>+</sup> | 4.4        | 3.2        | 3.4        | 3.4        | 3.7        | 3.7        | 5.5        | 4.2        | 3.5        | 3.4        | 3.8        | 2.7        | 3.4        | 3.8        |
| MRC              | 5.0        | 4.1        | 5.1        | 4.1        | 4.7        | 4.9        | 5.6        | 5.7        | 4.1        | 4.6        | 4.5        | 4.6        | 4.2        | 4.7        |
| DISN             | <b>2.2</b> | 2.3        | 3.2        | 2.4        | 2.8        | <b>2.5</b> | 3.9        | <b>3.1</b> | <b>1.9</b> | <b>2.3</b> | 2.9        | <b>1.9</b> | 2.3        | 2.6        |
| Ours             | 2.5        | <b>2.2</b> | <b>3.0</b> | <b>2.2</b> | <b>2.3</b> | <b>2.5</b> | <b>3.2</b> | 3.4        | 2.0        | 2.4        | <b>2.7</b> | 2.2        | <b>2.2</b> | <b>2.5</b> |

Table 4: **Shell-Intersection over Union** (IoU, %) for single view reconstructions on ShapeNet Core, with various methods, computed on voxelized surfaces scaled to fit unit radius sphere. The higher the better.

| method           | category  |           |           |           |           |           |           |           |           |           |           |           |           | mean      |
|------------------|-----------|-----------|-----------|-----------|-----------|-----------|-----------|-----------|-----------|-----------|-----------|-----------|-----------|-----------|
|                  | plane     | bench     | box       | car       | chair     | display   | lamp      | speaker   | rifle     | sofa      | table     | phone     | boat      |           |
| AN               | 20        | 13        | 7         | 16        | 13        | 12        | 14        | 8         | 28        | 11        | 15        | 14        | 17        | 15        |
| P2M <sup>+</sup> | 31        | 34        | 23        | 26        | 28        | 28        | 28        | 20        | 42        | 24        | 33        | 35        | 34        | 30        |
| MRC              | 24        | 26        | 18        | 22        | 21        | 23        | 21        | 16        | 33        | 19        | 27        | 28        | 27        | 24        |
| DISN             | 40        | 33        | 20        | 31        | 25        | <b>33</b> | 21        | 19        | <b>60</b> | 29        | 25        | <b>44</b> | 34        | 30        |
| Ours             | <b>41</b> | <b>41</b> | <b>29</b> | <b>34</b> | <b>36</b> | <b>33</b> | <b>37</b> | <b>24</b> | 51        | <b>31</b> | <b>38</b> | 43        | <b>37</b> | <b>37</b> |

Table 5: **F-Score (%)** at threshold  $d = 0.1$  for single view reconstructions on ShapeNet Core, with various methods, computed on shapes scaled to fit unit radius sphere, sampled with 10000 points. The higher the better.

| method | category    |             |             |             |             |             |             |             |             |             |             |             |             | mean        |
|--------|-------------|-------------|-------------|-------------|-------------|-------------|-------------|-------------|-------------|-------------|-------------|-------------|-------------|-------------|
|        | plane       | bench       | box         | car         | chair       | display     | lamp        | speaker     | rifle       | sofa        | table       | phone       | boat        |             |
| AN     | 91.2        | 85.9        | 73.8        | 94.4        | 90.5        | 84.3        | 81.4        | 79.7        | 95.6        | 91.1        | 90.8        | 90.4        | 90.3        | 89.3        |
| P2M+   | 90.3        | 97.1        | <b>96.0</b> | 97.9        | 95.7        | 93.1        | 90.2        | <b>91.3</b> | 96.8        | 96.5        | <b>95.8</b> | <b>97.6</b> | 94.4        | 95.0        |
| MRC    | 88.4        | 93.3        | 92.1        | 96.4        | 92.0        | 91.4        | 85.8        | 88.3        | 94.9        | 95.0        | 93.9        | 95.9        | 92.8        | 92.5        |
| DISN   | 94.4        | 94.3        | 88.8        | 96.2        | 90.2        | 91.8        | 77.9        | 85.4        | 96.3        | 95.7        | 86.6        | 96.4        | 93.0        | 90.7        |
| Ours   | <b>96.1</b> | <b>97.5</b> | 94.3        | <b>98.5</b> | <b>97.4</b> | <b>95.8</b> | <b>92.7</b> | 90.6        | <b>98.0</b> | <b>97.0</b> | 95.5        | 96.4        | <b>97.1</b> | <b>96.2</b> |

## 93 References

- 94 [1] H. Chen. Single image depth estimation with feature pyramid network. <https://github.com/xanderchf/MonoDepth-FPN-PyTorch>, 2018.
- 95
- 96 [2] G. Gkioxari, J. Malik, and J. Johnson. Mesh r-cnn. In *International Conference on Computer Vision*, pages 9785–9795, 2019.
- 97
- 98 [3] T. Groueix, M. Fisher, V. Kim, B. Russell, and M. Aubry. Atlasnet: A Papier-Mâché Approach to Learning 3D Surface Generation. In *Conference on Computer Vision and Pattern Recognition*, 2018.
- 99
- 100
- 101 [4] K. He, X. Zhang, S. Ren, and J. Sun. Deep Residual Learning for Image Recognition. In *Conference on Computer Vision and Pattern Recognition*, pages 770–778, 2016.
- 102
- 103 [5] C. R. Qi. Autoencoder for point clouds. <https://github.com/charlesq34/pointnet-autoencoder>, 2018.
- 104
- 105 [6] X. Sun. Pix3d: Dataset and methods for single-image 3d shape modeling. <https://github.com/xingyuansun/pix3d>, 2018.
- 106
- 107 [7] M. Tatarchenko, S. Richter, R. Ranftl, Z. Li, V. Koltun, and T. Brox. What do Single-view 3D Reconstruction Networks Learn? In *Conference on Computer Vision and Pattern Recognition*, pages 3405–3414, 2019.
- 108
- 109
- 110 [8] N. Wang, Y. Zhang, Z. Li, Y. Fu, W. Liu, and Y.-G. Jiang. Pixel2mesh: Generating 3d mesh models from single rgb images. In *European Conference on Computer Vision*.
- 111
- 112 [9] Q. Xu, W. Wang, D. Ceylan, R. Mech, and U. Neumann. Disn: Deep implicit surface network for high-quality single-view 3d reconstruction. In *Advances in Neural Information Processing Systems*, pages 490–500, 2019.
- 113
- 114
- 115 [10] Y. Yang, C. Feng, Y. Shen, and D. Tian. Foldingnet: Point cloud auto-encoder via deep grid deformation. In *Conference on Computer Vision and Pattern Recognition*, pages 206–215, 2018.
- 116
- 117
